# Supplementary material
Source: PubMed Central journal article supplement (PMC8128933)

Supplementary Figure 1: Kaplan-Meier curve for achieving complete remission of dysplasia in subset of patients treated from 2015-2020. The odds of CRD remained lower for cEMR than for ESD (HR: 0.67; 95% CI: 0.45-0.99).

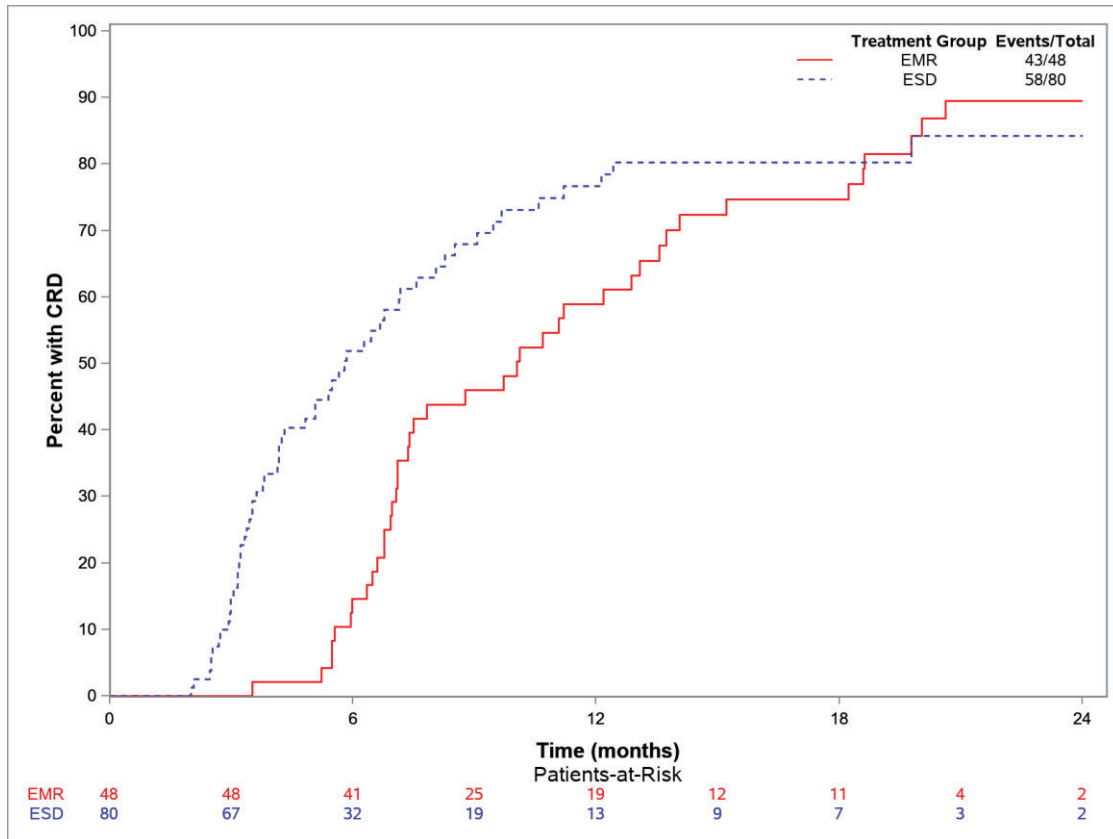

Supplement: NIHMS1647643-supplement-Supplement_material_1.pdf [file NIHMS1647643-supplement-Supplement_material_1.pdf]
