# Supplementary material
Source: PubMed Central journal article supplement (PMC8128933)

Supplementary Figure 2: Kaplan-Meier curve for achieving complete remission of intestinal metaplasia in subset of patients treated from 2015-2020. The odds of CRIM were not statistically significant between the treatment modalities (HR: 0.88; 95% CI: 0.54-1.43).

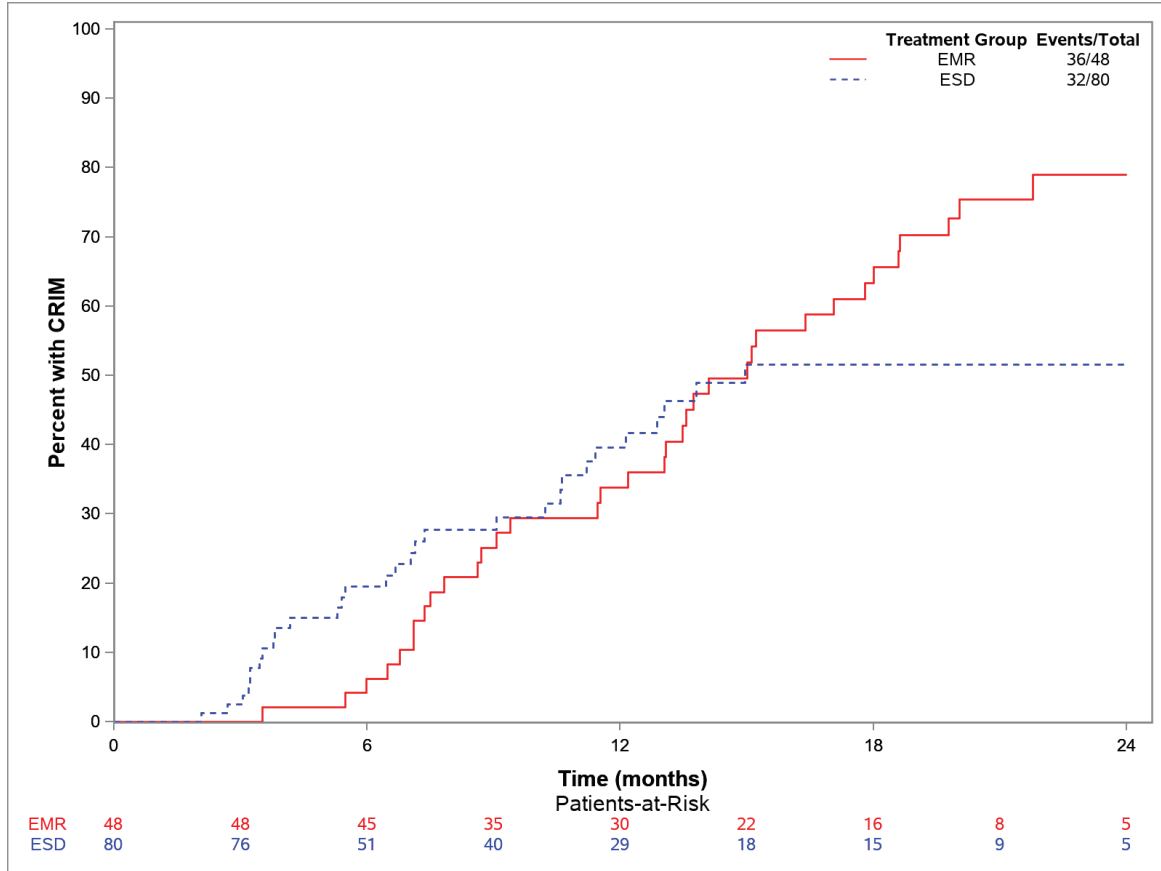

Supplement: NIHMS1647643-supplement-Supplement_material_2.pdf [file NIHMS1647643-supplement-Supplement_material_2.pdf]
